# Supplementary material for: Removal of Erythromycin from Water by Ibuprofen-Driven Pre-Organized Divinyl Sulfone Cross-Linked Dextrin
Source: MDPI journal article supplement (doi:10.3390/polym16081090), 2024-04-13
Supplement: s1 [file s1]

# Supplementary Materials

## Removal of Erythromycin from Water by Ibuprofen-Driven Pre-Organized Divinyl Sulfone Cross-Linked Dextrin

**Mariano Ortega-Muñoz<sup>1,2,3</sup>, Sarah Alvarado<sup>1,†</sup>, Alicia Megia-Fernandez<sup>1,2,3</sup>, Fernando Hernandez-Mateo<sup>1,2,3</sup>, Francisco Javier Lopez-Jaramillo<sup>1,2,3,\*</sup> and Francisco Santoyo-Gonzalez<sup>1,2,3,\*</sup>**

1 Department of Organic Chemistry, Faculty of Sciences, University of Granada, 18073 Granada, Spain

2 Unit of Excellence in Chemistry Applied to Biomedicine and the Environment, University of Granada, 18073 Granada, Spain

3 Biotechnology Institute, University of Granada, 18071 Granada, Spain

\* Correspondence: [fjljara@ugr.es](mailto:fjljara@ugr.es) (F.J.L.-J.); [fsantoyo@ugr.es](mailto:fsantoyo@ugr.es) (F.S.-G.)

† Current address: Institute for Advanced Chemistry of Catalonia, CSIC, 08034 Barcelona, Spain.

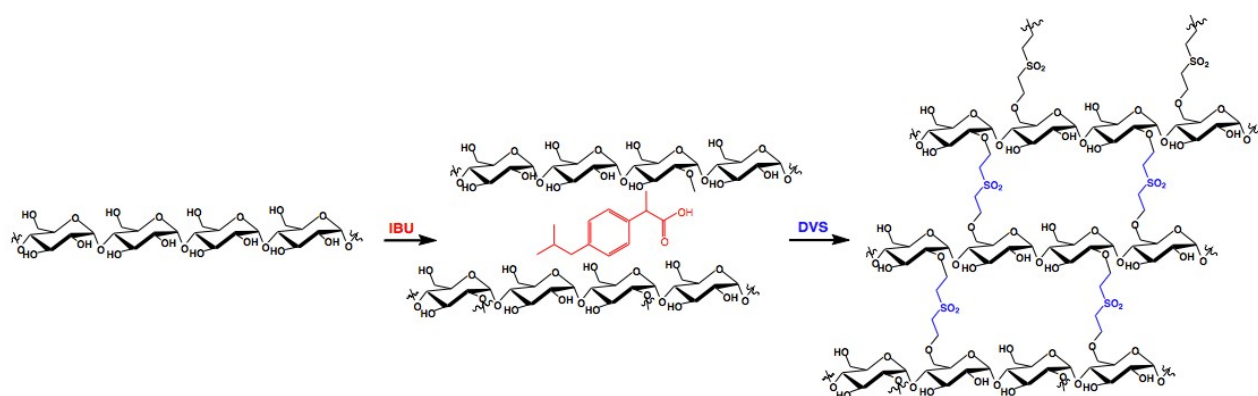

**Scheme S1.** Synthesis of the ibuprofen (IBU) driven preorganized divinyl sulfone (DVS) cross-linked dextrin

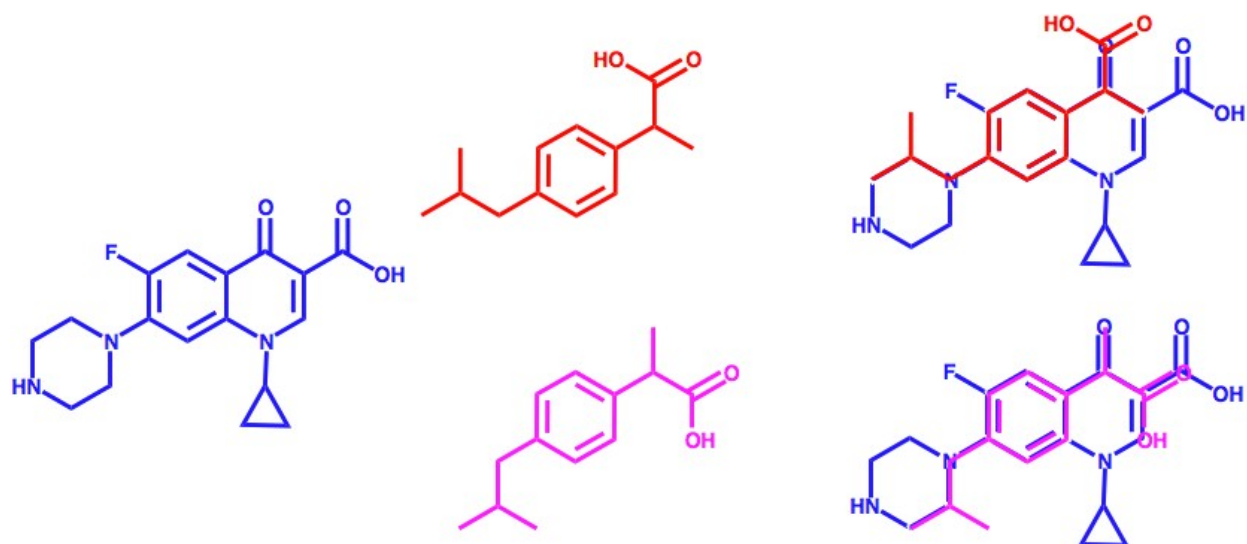

**Figure S1.** Superimposition of two conformers of ibuprofen (red and magenta) on ciprofloxacin (blue).

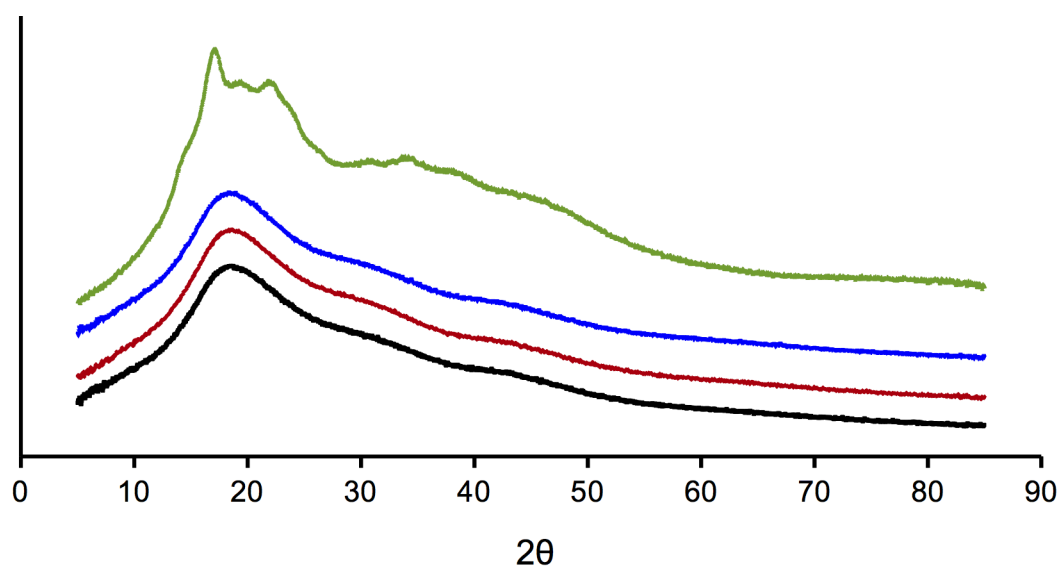

**Figure S2.** XRPD of the starting material Dx (green) and the polymers **pDx0** (black), **pDx1** (red) and **pDx5** (blue).

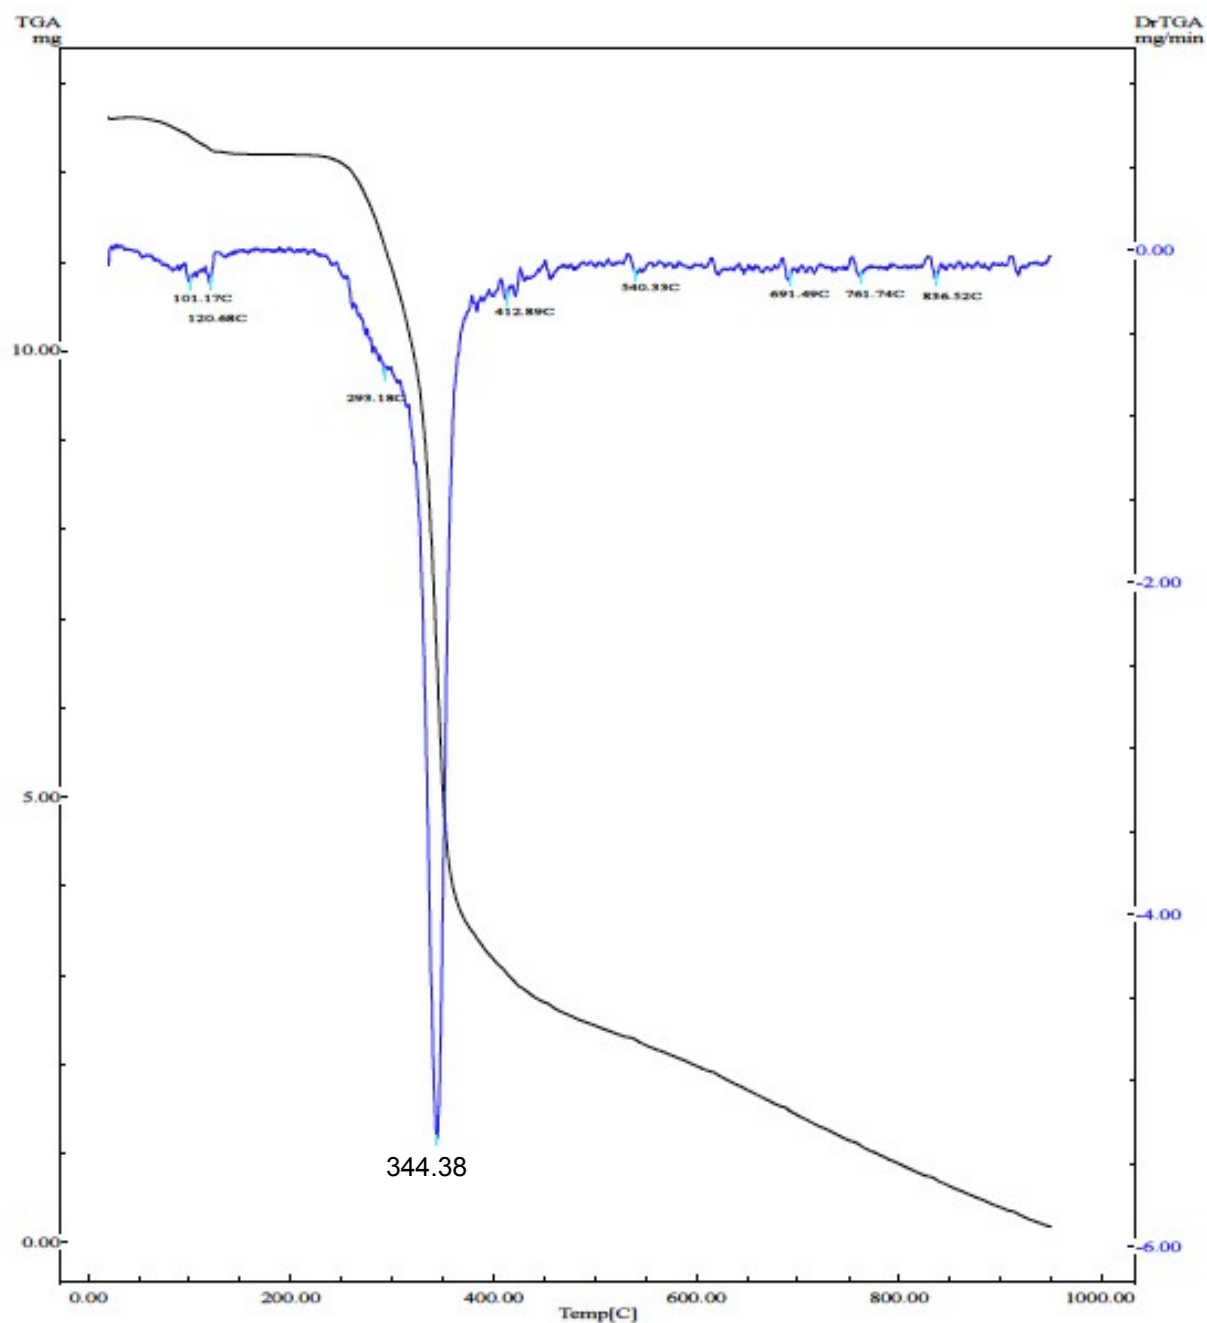

**Figure S3.** Derivative TGA of **pDx0**. In black is shown the evolution of the mass of the sample as a function of the temperature and in blue the first derivative.

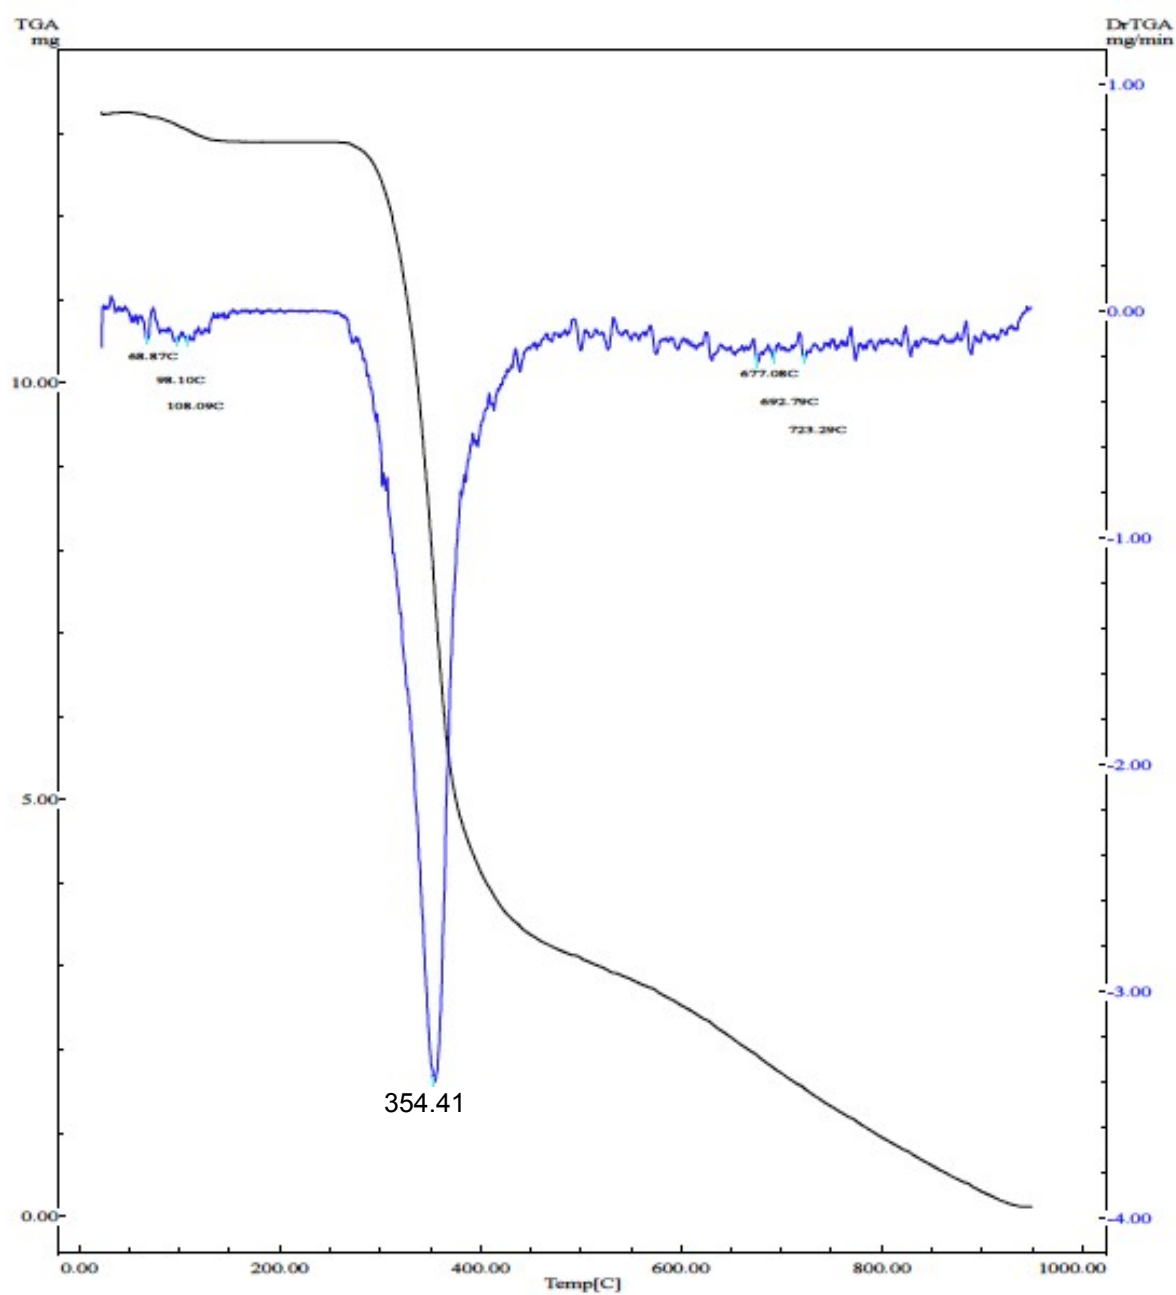

**Figure S4.** Derivative TGA of **pDx1**. In black is shown the evolution of the mass of the sample as a function of the temperature and in blue the first derivative.

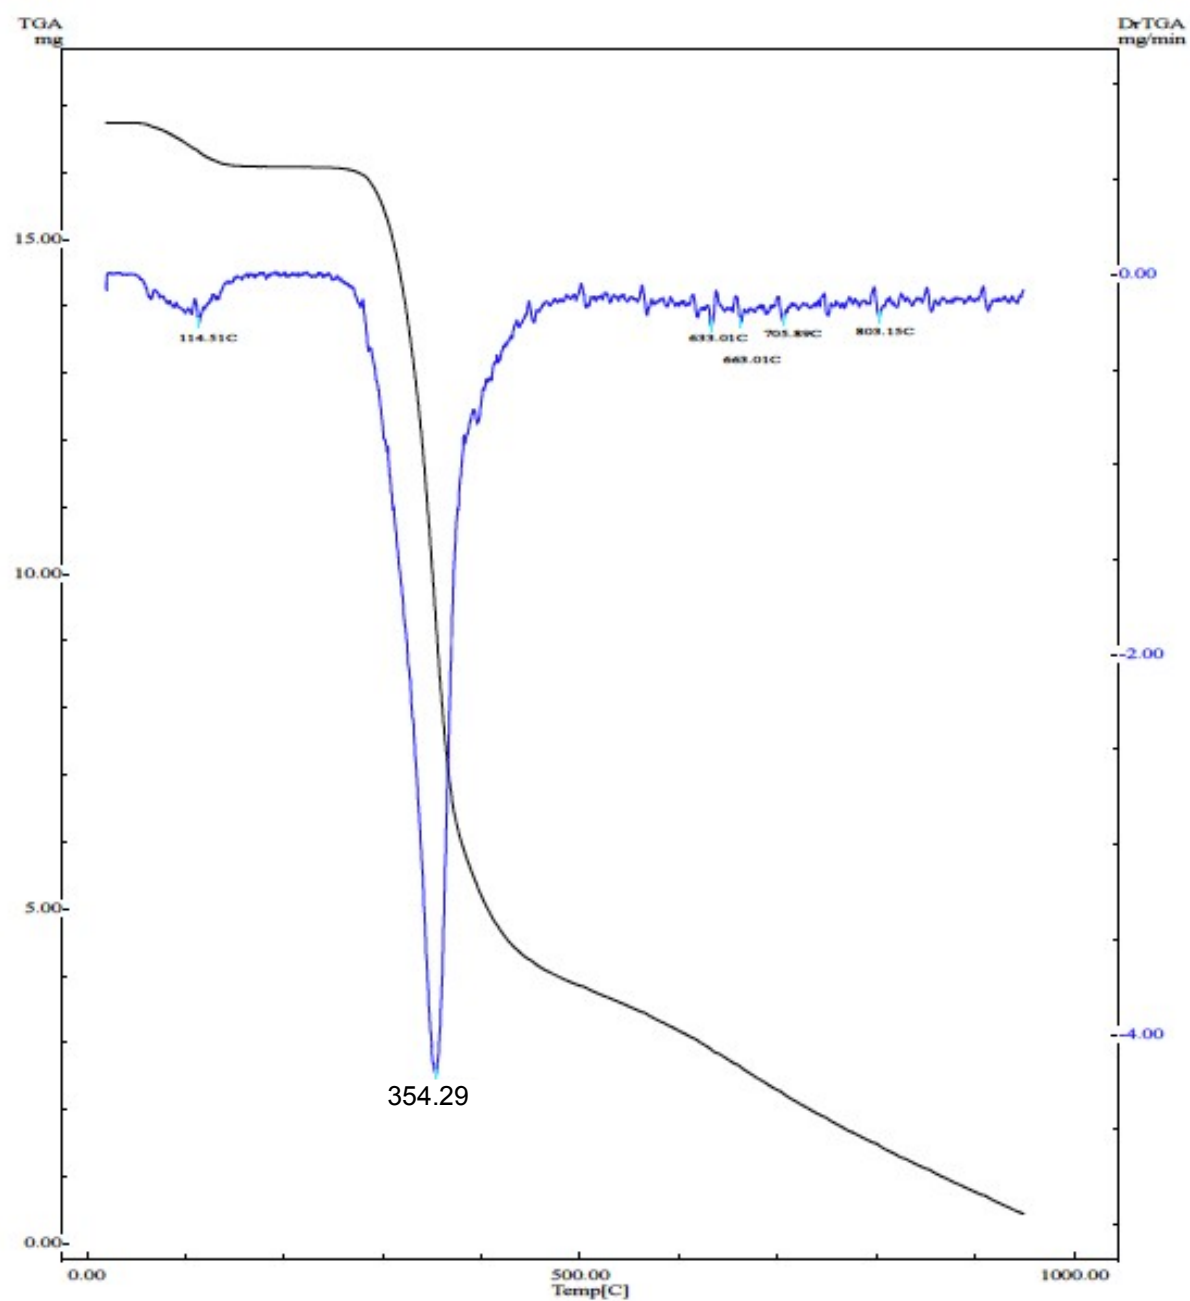

**Figure S5.** Derivative TGA of **pDx5**. In black is shown the evolution of the mass of the sample as a function of the temperature and in blue the first derivative.

(a)

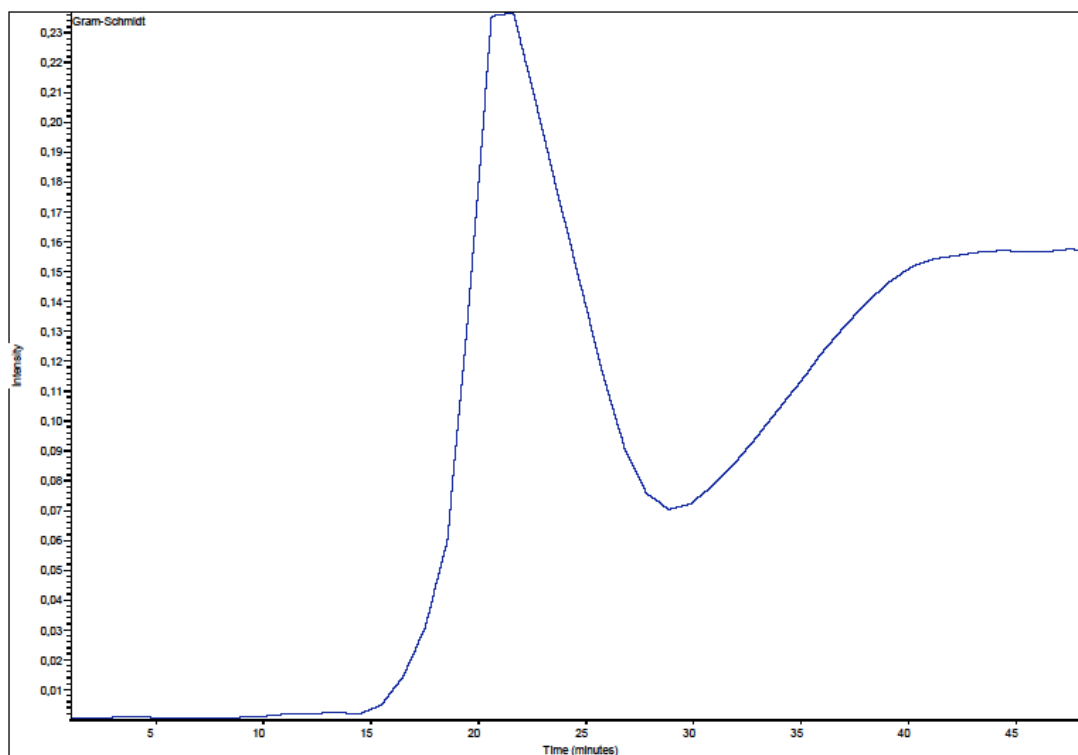

(b)

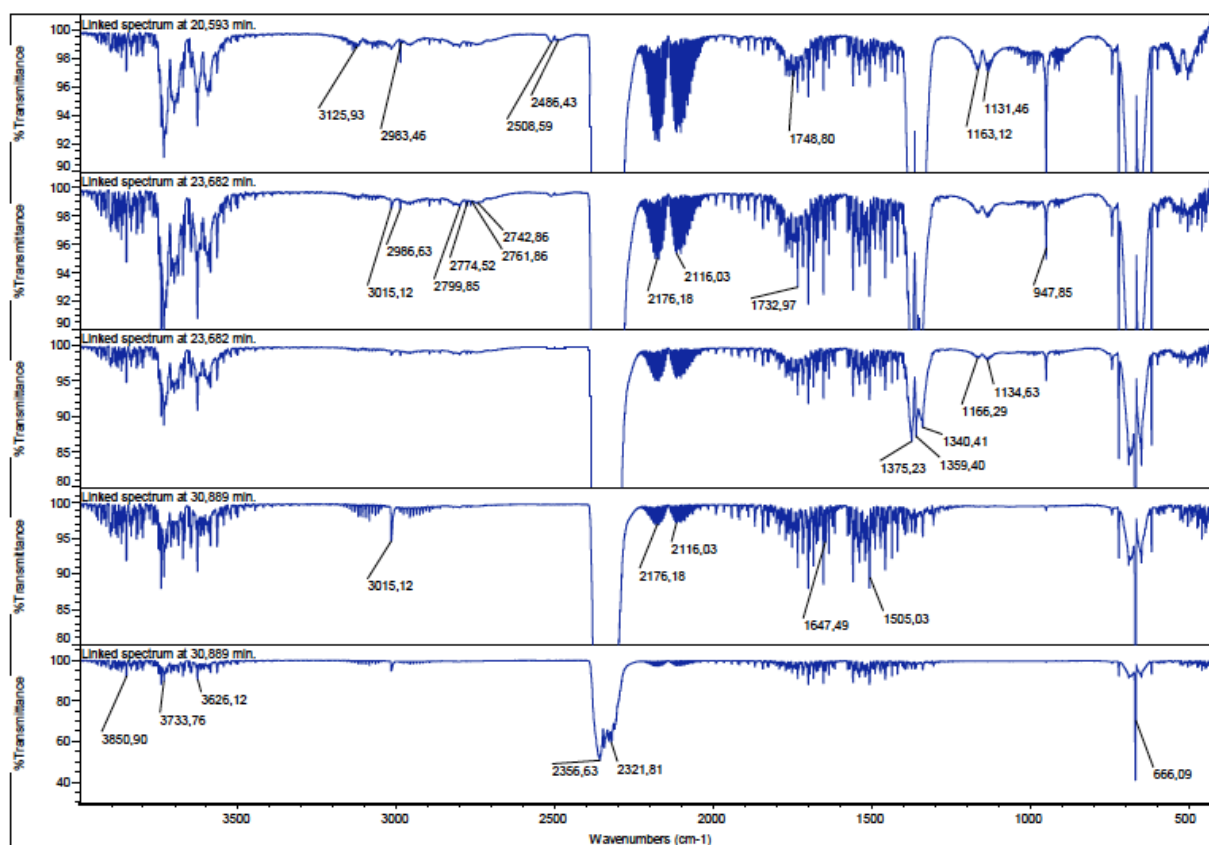

**Figure S6.** IR-TGA of **pDx0**. (a) Gram-Schmidt. (b) Most representative signals at three single time points 20.6 min, 23.7 min and 34.9 min. The delay between the TG and the FTIR detector is from 4 to 5 min.



(a)

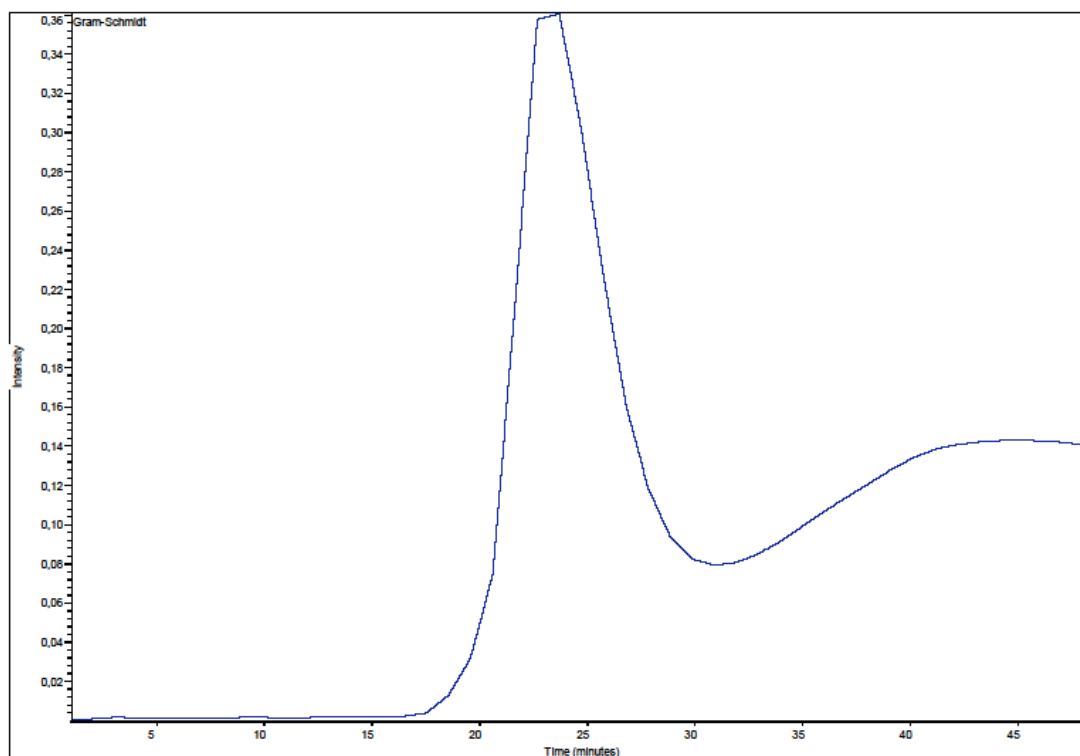

(b)

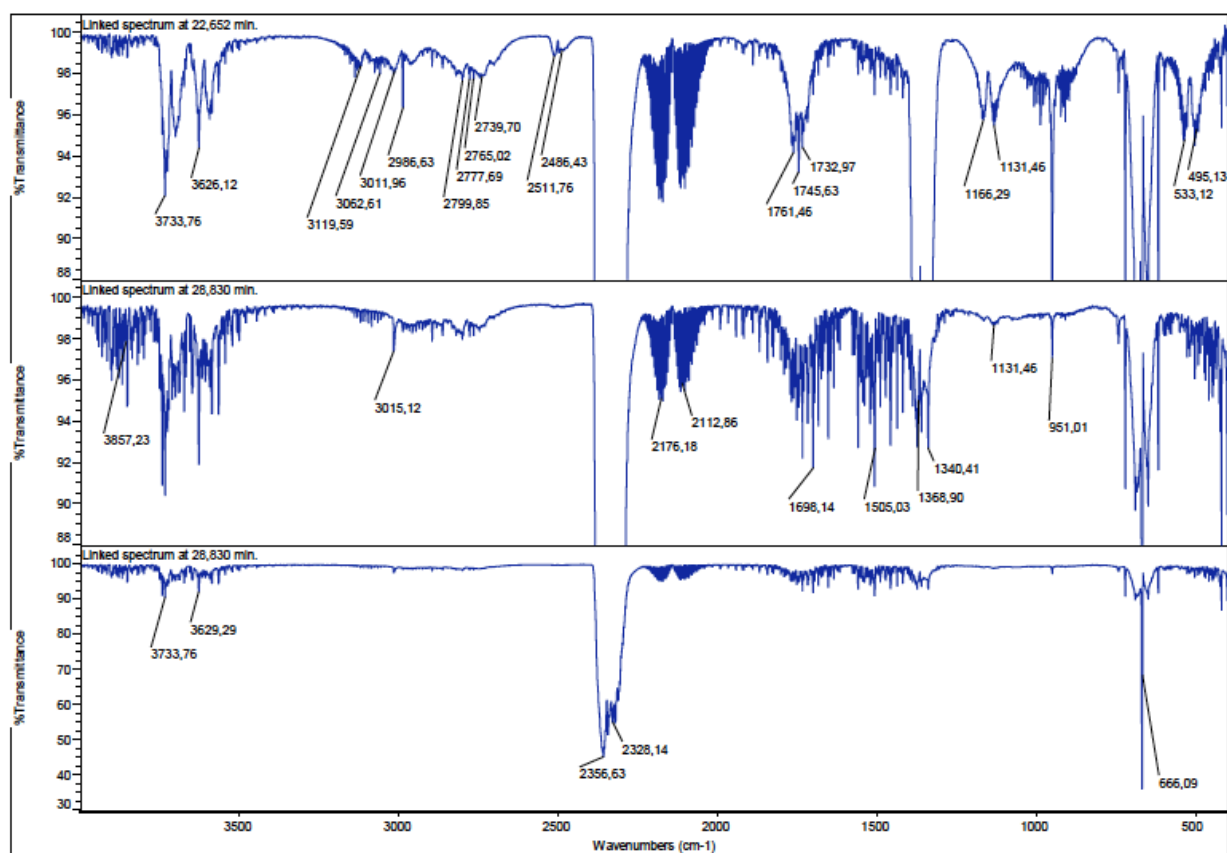

**Figure S7.** IR-TGA of **pDx1**. (a) Gram-Schmidt. (b) Most representative signals at two single time points 22.6 min and 28.8 min. The delay between the TG and the FTIR detector is from 4 to 5 min.

(a)

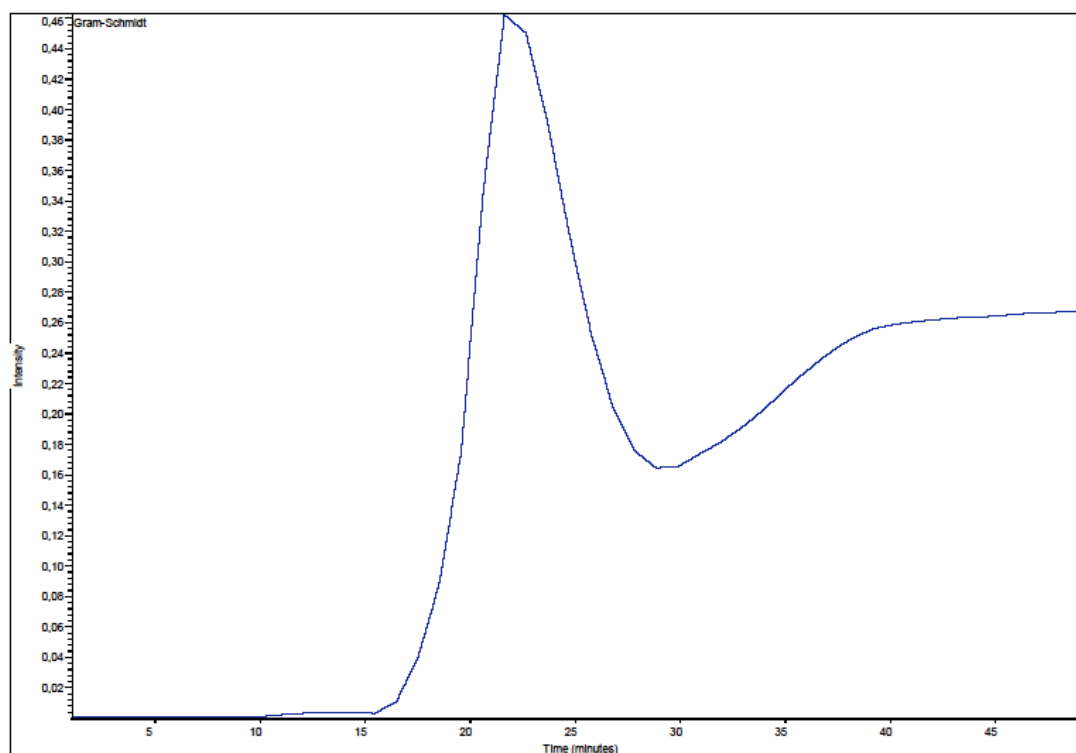

(b)

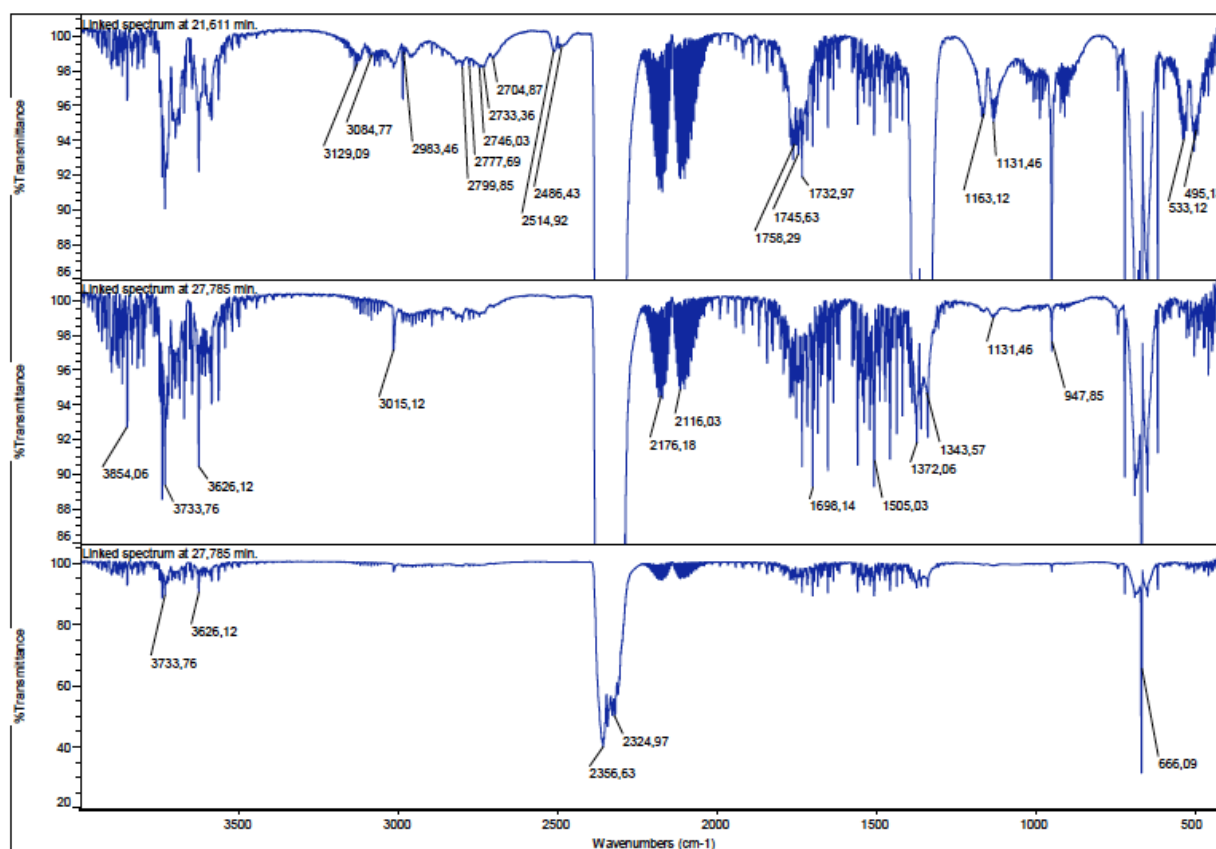

**Figure S8.** IR-TGA of **pDx5**. (a) Gram-Schmidt. (b) Most representative signals at two single time points 21.6 min and 27.8 min. The delay between the TG and the FTIR detector is from 4 to 5 min.

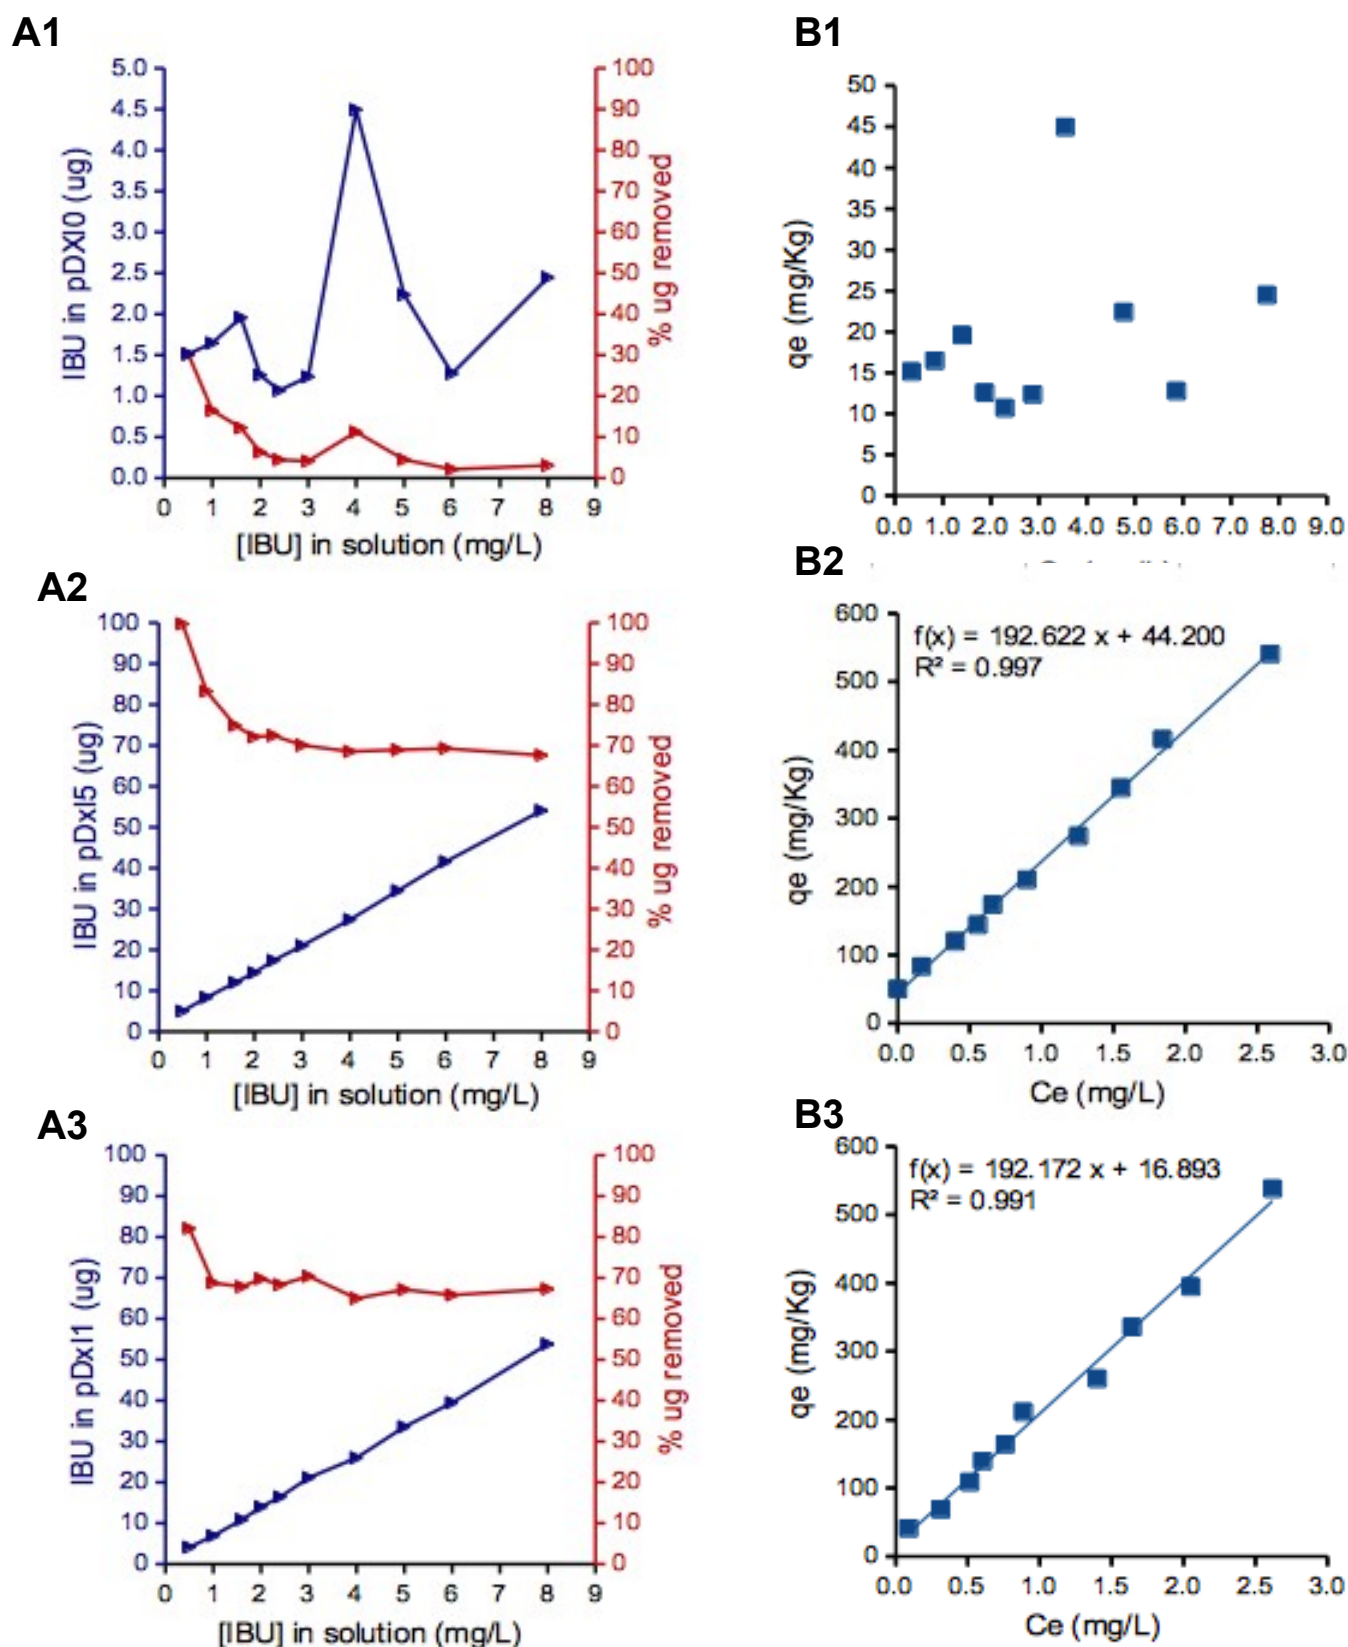

**Figure S9.** Characterization of the polymers **pDx0** (A1 & B1), **pDx1** (A2 & B2) and **pDx5** (A3 & B3) as scavenger of IBU. A: sorption isotherm showing in blue the amount retained by the polymer and in red the percentage removed from the solution as a function of the initial concentration of IBU. B: estimation of  $K_d$ .

**Table S1. Mass/volume of reagents used for the synthesis of the polymers**

| Reagent                                | Mass (g)     | Volume (mL) | Resulting pH |
|----------------------------------------|--------------|-------------|--------------|
| Ibuprofen                              | 0.206 / 1.03 |             |              |
| Water                                  |              | 200         |              |
| 0.83 M Na <sub>2</sub> CO <sub>3</sub> |              | 13          | 9.5          |
| 5.5 hour s of gentle stirring          |              |             |              |
| DVS                                    | 5.7          | 5           |              |
| Water                                  |              | 100         |              |
| 30 min of gentle stirring              |              |             |              |
| 0.83 M Na <sub>2</sub> CO <sub>3</sub> |              | 187         | 12           |
| 16 hours of gentle stirring            |              |             |              |

**Table S2.** Equations of the isotherm model assayed for the fitting of the experimental sorption data as defined by ISOT\_calc<sup>1</sup>.

| <b>Isotherm<br/>(# parameters)</b> | <b>Equation (q<sub>e</sub> = ...)</b>                                                                         | <b>Parameter definition<sup>2</sup></b>                                                                                                |
|------------------------------------|---------------------------------------------------------------------------------------------------------------|----------------------------------------------------------------------------------------------------------------------------------------|
| Temkin<br>(2)                      | $k_1 \cdot \ln(C_e) + k_2$                                                                                    | $k_1$ and $k_2$ are constants of Temkin isotherm and $k_1$ is related to sorption heat                                                 |
| Freundlich<br>(2)                  | $K_F \cdot C_e^N$                                                                                             | $K_F$ is adsorption potential<br>$N$ is strength constant associated to heterogeneity (for homogenous systems $N=1$ )                  |
| Langmuir<br>(2)                    | $S_T \frac{K_L \cdot C_e}{1 + K_L \cdot C_e}$                                                                 | $S_T$ is maximum adsorption capacity<br>$K_L$ is affinity constant                                                                     |
| Redlich-Peterson<br>(3)            | $S_T \frac{k \cdot C_e}{(1 + C_e)^N}$                                                                         | $S_T$ is maximum adsorption capacity<br>$k$ is related to constants of Redlich-Peterson model<br>$N$ ranges from 0 to 1                |
| Vieth-Sladek<br>(3)                | $K_D \cdot C_e + \frac{S_T \cdot b \cdot C_e}{1 + b \cdot C_e}$                                               | $K_D$ and $b$ are Vieth-Sladek constants<br>$S_T$ is the maximum adsorption capacity                                                   |
| 2-sites Langmuir<br>(4)            | $\frac{S_{T1} \cdot k_1 \cdot C_e}{1 + k_1 \cdot C_e} + \frac{S_{T2} \cdot k_2 \cdot C_e}{1 + k_2 \cdot C_e}$ | $S_{T1}$ and $S_{T2}$ are the maximum adsorption capacity for sites 1 and 2<br>$K_1$ and $K_2$ are affinity constant for sites 1 and 2 |

- 1 José L. Beltrán, Joseph J. Pignatello, and Marc Teixidó, "ISOT\_Calc: A Versatile Tool for Parameter Estimation in Sorption Isotherms," *Computers & Geosciences*, 2016, 94: 11–17, doi:10.1016/j.cageo.2016.04.008.
- 2 Mahdieh Mozaffari Majd et al., "Adsorption Isotherm Models: A Comprehensive and Systematic Review (2010–2020)," *Science of The Total Environment*, 2022, 812, 151334, doi:10.1016/j.scitotenv.2021.151334.

**Table S3.** Elemental analysis of ibuprofen pre-incubated cross-linked polymers. Results are expressed as means  $\pm$  SD (n = 3).

|            | <b>pDx0</b>       | <b>pDx1</b>       | <b>pDx5</b>       |
|------------|-------------------|-------------------|-------------------|
| <b>% C</b> | 39.84 $\pm$ 0.055 | 39.85 $\pm$ 0.060 | 39.91 $\pm$ 0.330 |
| <b>% H</b> | 7.35 $\pm$ 0.648  | 7.39 $\pm$ 0.142  | 7.62 $\pm$ 0.035  |
| <b>% S</b> | 6.21 $\pm$ 0.428  | 6.31 $\pm$ 0.270  | 5.85 $\pm$ 0.480  |
